# Supplementary material for: One-pot synthesis of nanoscale carbon dots-embedded metal–organic frameworks at room temperature for enhanced chemical sensing
Source: Royal Society of Chemistry journal article supplement (doi:10.1039/c6ta06403e), 2016-01-01
Supplement: c6ta06403e1.pdf [file c6ta06403e1.pdf]

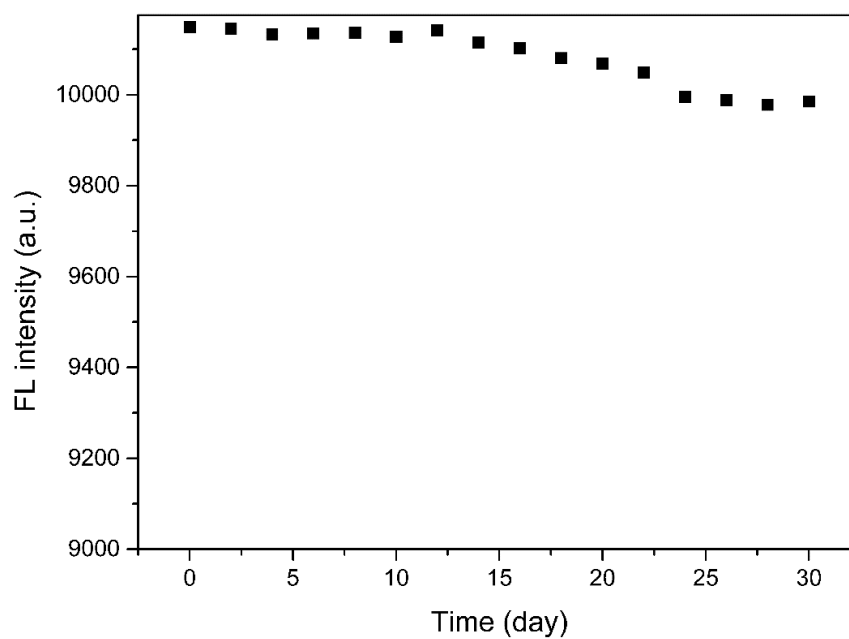

Fig. S1. FL intensity of CDs@ZIF-8 at different time.

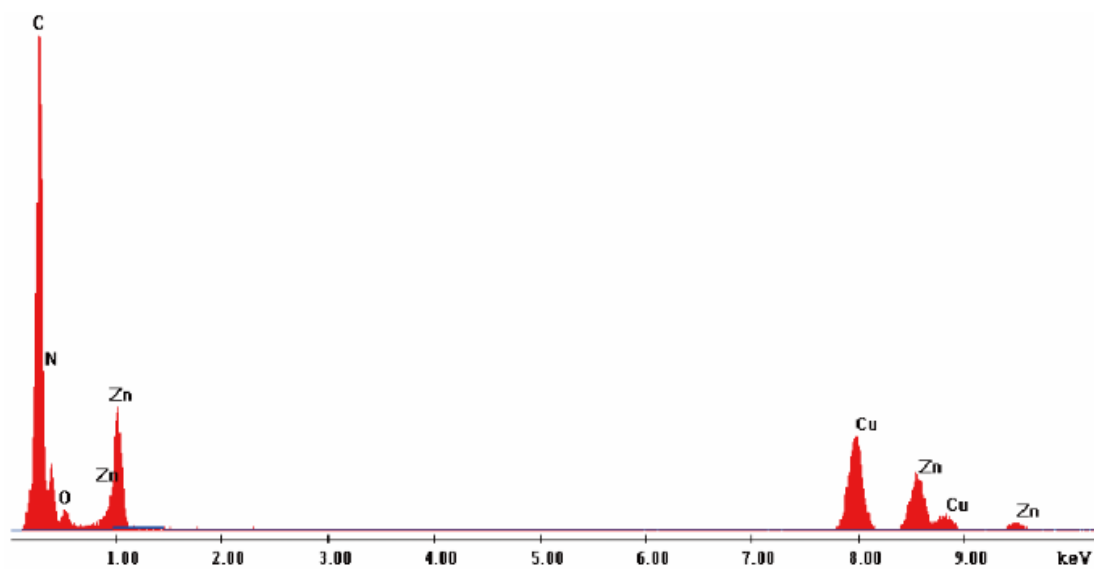

a

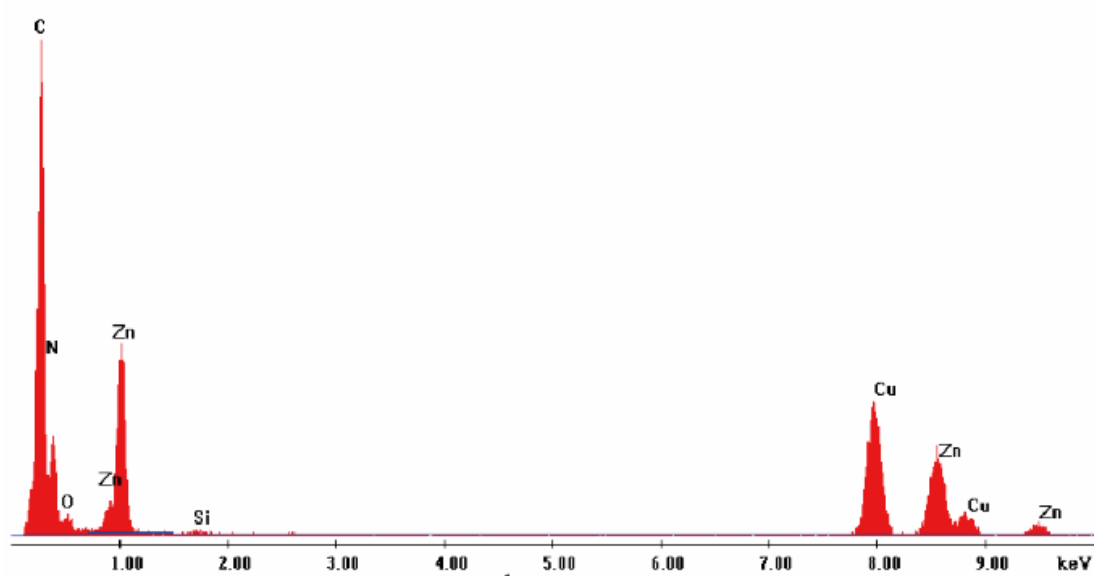

b

Fig. S2. EDS analysis of (a) ZIF-8 and (b) CDs@ZIF-8 composite.

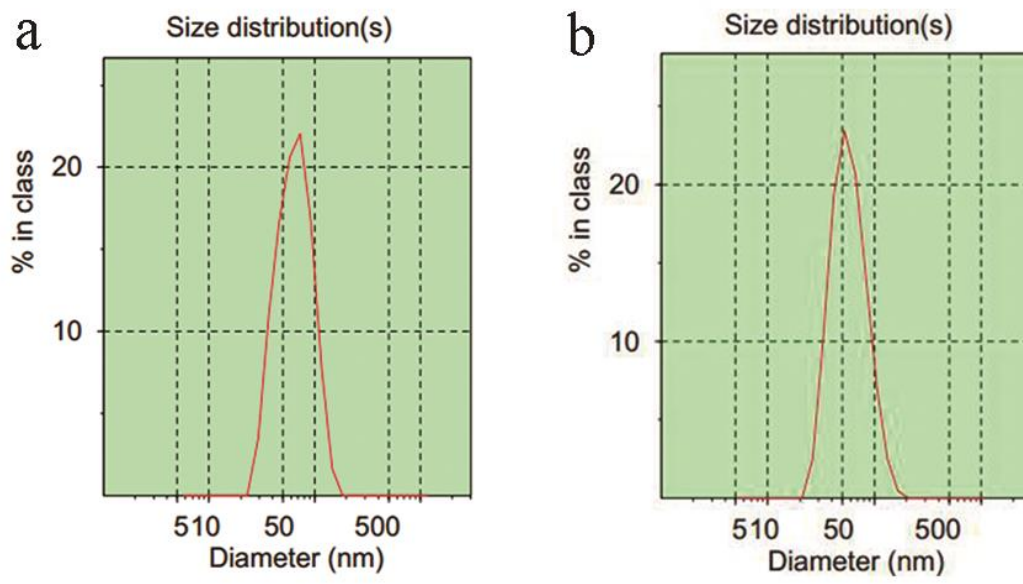

Fig. S3. DLS analysis of (a) ZIF-8 and (b) CDs@ZIF-8 composite.

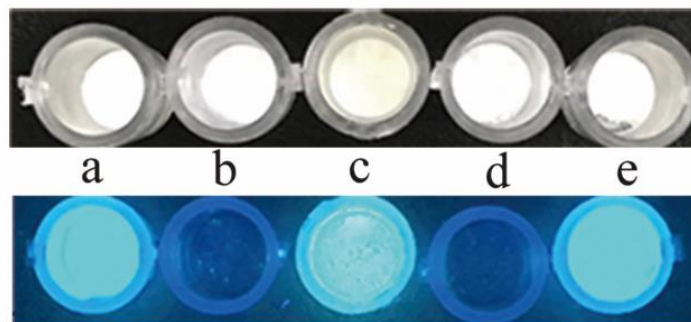

Fig. S4. Photographs of (a) CDs@ZIF-8 (b) ZIF-8 (c) CDs+ZIF-8 before washing (d) CDs+ZIF-8 after washing (e) CDs@ZIF-8 after washing under natural and UV light (365nm), respectively.

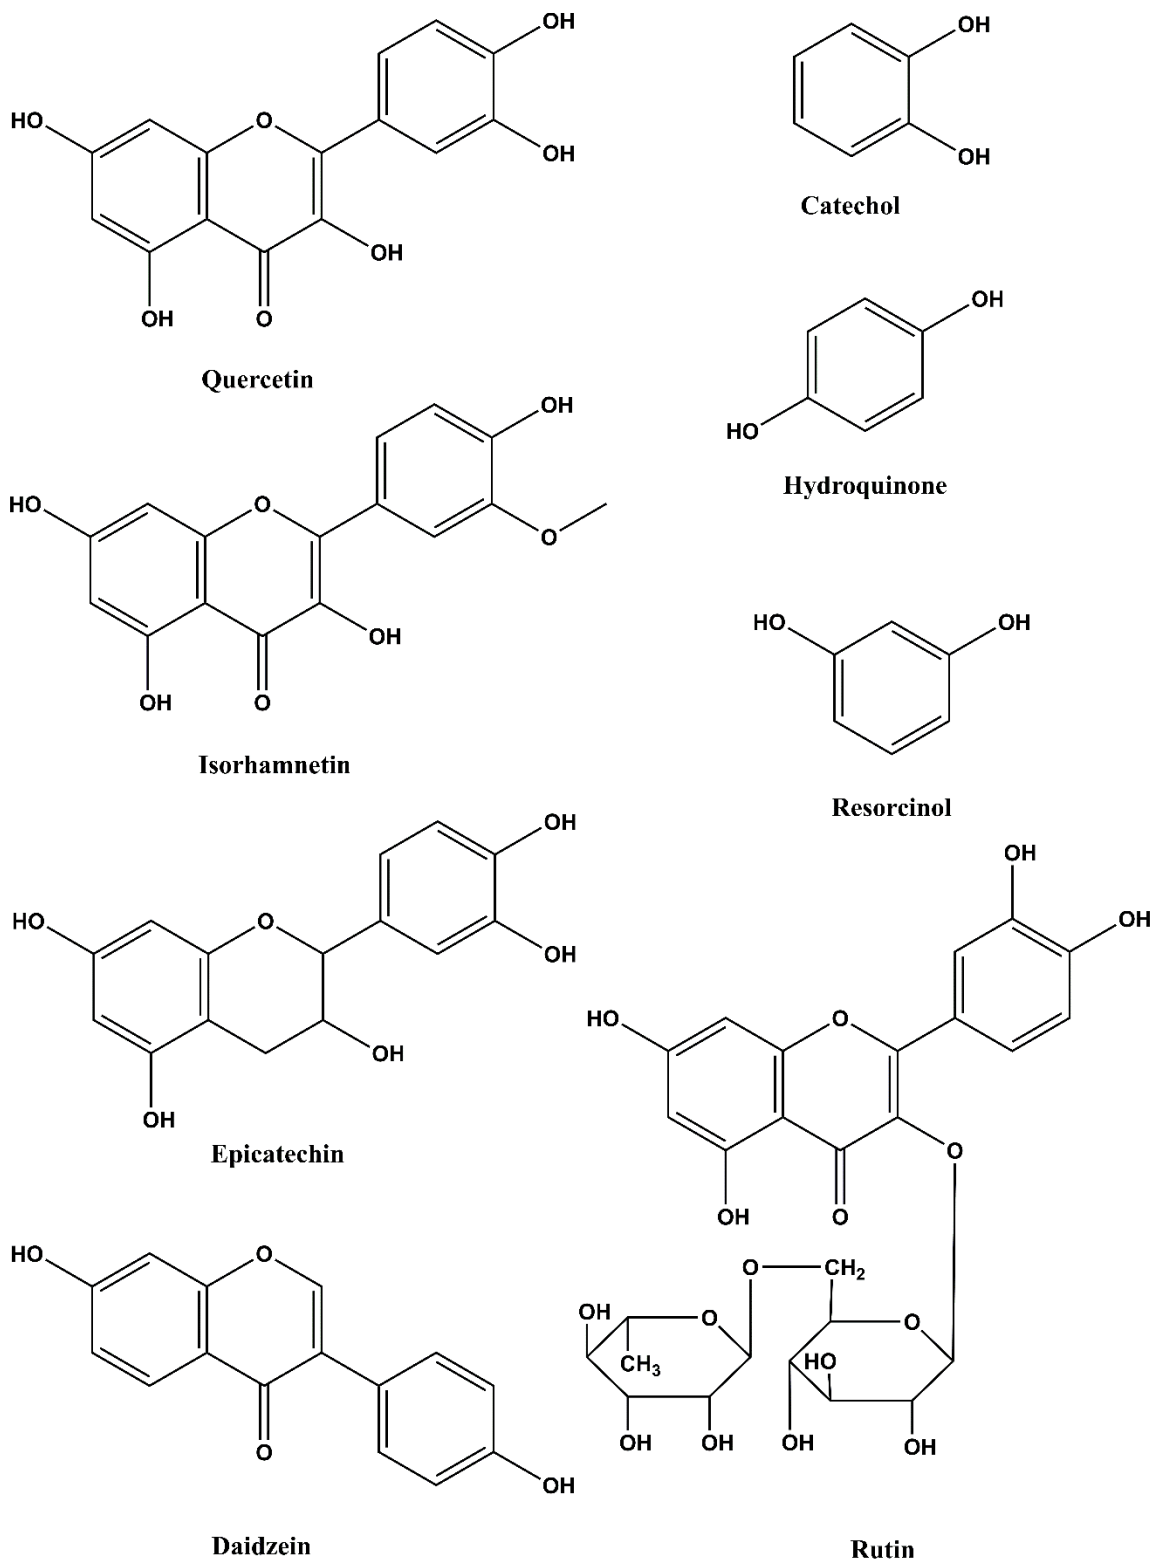

Fig. S5. Chemical structure of flavonoids and phenolic compounds used in this study.

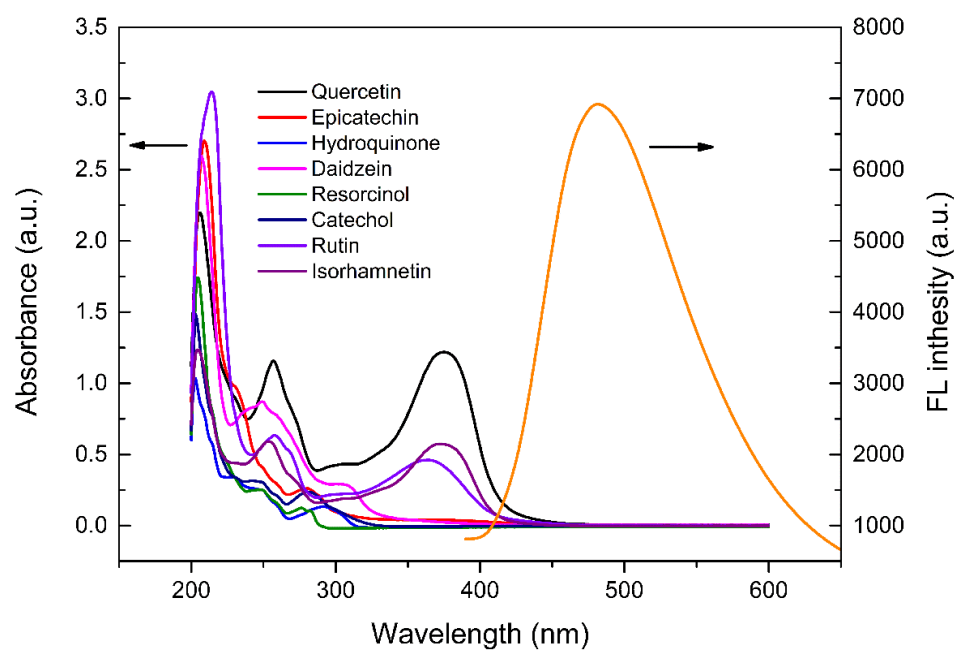

Fig. S6. UV-vis absorption spectra of flavonoids and phenolic compounds and FL emission spectra of CDs@ZIF-8.

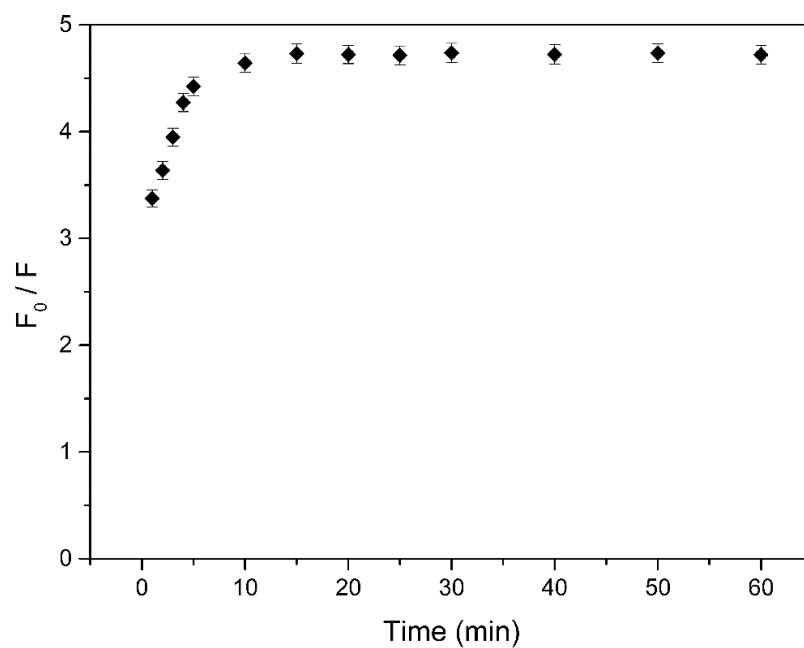

Fig. S7. The dependence of FL response of CDs@ZIF-8 on reaction time.
